# Supplementary material
Source: ML conference proceedings conference paper supplement (https://proceedings.mlr.press/v84/ma18a.html)
Supplement: Supplementary file 1 [file ma18a-supp.pdf]

## Supplemental Material

**Lemma 7.** For the large margin classifier  $\hat{\theta}_S$ , we have

$$\mathbf{P} \left[ R(\hat{\theta}_S) > \epsilon \right] = \begin{cases} (1 - \epsilon)^n + (\epsilon)^n & 0 < \epsilon \leq \frac{1}{2} \\ \left(\frac{1}{2}\right)^{n-1} & \frac{1}{2} < \epsilon < 1 \\ 0 & \epsilon = 1. \end{cases} \quad (29)$$

*Proof.* The risk is  $R(\hat{\theta}_S) = |\hat{\theta}_S|$ . Define event  $E : \{\exists(x, -1) \in S \wedge \exists(x, +1) \in S\}$ .  $\mathbf{P} \left[ |\hat{\theta}_S| \leq \epsilon \right]$  can be decomposed into two components depending on if  $E$  happens as (40) shows.

$$\mathbf{P} \left[ |\hat{\theta}_S| \leq \epsilon \right] = \mathbf{P} \left[ |\hat{\theta}_S| \leq \epsilon, E \right] + \mathbf{P} \left[ |\hat{\theta}_S| \leq \epsilon, E^c \right]. \quad (40)$$

$\mathbf{P} \left[ |\hat{\theta}_S| \leq \epsilon, E^c \right] = \mathbf{P} \left[ |\hat{\theta}_S| \leq \epsilon \mid E^c \right] \mathbf{P} \left[ E^c \right]$ . Note that  $\mathbf{P} \left[ E^c \right] = \left(\frac{1}{2}\right)^{n-1}$ ,  $\mathbf{P} \left[ |\hat{\theta}_S| \leq \epsilon \mid E^c \right]$  is 0 if  $\epsilon < 1$  and 1 if  $\epsilon = 1$  because  $\hat{\theta}_S = \pm 1$  always holds given  $E^c$  happens. Thus,

$$\mathbf{P} \left[ |\hat{\theta}_S| \leq \epsilon, E^c \right] = \begin{cases} 0 & \text{if } \epsilon < 1 \\ \left(\frac{1}{2}\right)^{n-1} & \text{if } \epsilon = 1. \end{cases} \quad (41)$$

Now we compute  $\mathbf{P} \left[ |\hat{\theta}_S| \leq \epsilon, E \right]$ . Let  $n_+$  be the number of positive points in  $S$ . Define  $E_i : \{n_+ = i\}$ . Note  $E_i \cap E_j = \emptyset$  if  $i \neq j$  and  $E = \cup_{i=1}^{n-1} E_i$ , thus

$$\mathbf{P} \left[ |\hat{\theta}_S| \leq \epsilon, E \right] = \sum_{i=1}^{n-1} \mathbf{P} \left[ |\hat{\theta}_S| \leq \epsilon, E_i \right] = \sum_{i=1}^{n-1} \mathbf{P} \left[ |\hat{\theta}_S| \leq \epsilon \mid E_i \right] \mathbf{P} \left[ E_i \right]. \quad (42)$$

$\mathbf{P} \left[ E_i \right] = C_i^n \left(\frac{1}{2}\right)^n$ . Note that  $\mathbf{P} \left[ |\hat{\theta}_S| \leq \epsilon \mid E_i \right] = \mathbf{P} \left[ \left| \frac{x_- + x_+}{2} \right| \leq \epsilon \mid E_i \right]$ . To compute it, we first compute  $F_{-x_-, x_+}(\epsilon_1, \epsilon_2 \mid E_i) = \mathbf{P} \left[ -x_- \leq \epsilon_1, x_+ \leq \epsilon_2 \mid E_i \right]$ . Given  $E_i$  happens,  $\mathbf{P} \left[ -x_- \leq \epsilon_1 \mid E_i \right] = 1 - (1 - \epsilon_1)^{n-i}$  and  $\mathbf{P} \left[ x_+ \leq \epsilon_2 \mid E_i \right] = 1 - (1 - \epsilon_2)^i$ . Also since  $-x_- \leq \epsilon_1$  and  $x_+ \leq \epsilon_2$  are independent given  $E_i$  happens, thus

$$F_{-x_-, x_+}(\epsilon_1, \epsilon_2 \mid E_i) = \mathbf{P} \left[ -x_- \leq \epsilon_1, x_+ \leq \epsilon_2 \mid E_i \right] = [1 - (1 - \epsilon_1)^{n-i}] [1 - (1 - \epsilon_2)^i]. \quad (43)$$

Take the derivative of  $F$  gives

$$f_{-x_-, x_+}(\epsilon_1, \epsilon_2 \mid E_i) = i(n - i)(1 - \epsilon_1)^{n-i-1}(1 - \epsilon_2)^{i-1}. \quad (44)$$

Note that  $|\hat{\theta}_S| \leq \epsilon \Leftrightarrow |x_1 - x_2| \leq 2\epsilon$ . Therefore, we integrate  $f_{-x_-, x_+}(\epsilon_1, \epsilon_2 \mid E_i)$  over the region  $|\epsilon_1 - \epsilon_2| \leq 2\epsilon$  to obtain  $\mathbf{P} \left[ |\hat{\theta}_S| \leq \epsilon \mid E_i \right]$ . However, note that  $0 \leq \epsilon_1, \epsilon_2 \leq 1$ , thus for  $\epsilon > \frac{1}{2}$ , the region  $|\epsilon_1 - \epsilon_2| \leq 2\epsilon$  becomes the whole  $[0, 1] \times [0, 1]$  and the integration is 1. Then (42) becomes  $\mathbf{P} \left[ |\hat{\theta}_S| \leq \epsilon, E \right] = \sum_{i=1}^{n-1} \mathbf{P} \left[ E_i \right] = \mathbf{P} \left[ E \right] = 1 - \left(\frac{1}{2}\right)^{n-1}$ . For  $\epsilon \leq \frac{1}{2}$ , by (42) we have

$$\begin{aligned} \mathbf{P} \left[ |\hat{\theta}_S| \leq \epsilon, E \right] &= \sum_{i=1}^{n-1} \mathbf{P} \left[ E_i \right] \int_{|\epsilon_1 - \epsilon_2| \leq 2\epsilon} i(n - i)(1 - \epsilon_1)^{n-i-1}(1 - \epsilon_2)^{i-1} d\epsilon_2 d\epsilon_1 \\ &= \sum_{i=1}^{n-1} C_i^n \left(\frac{1}{2}\right)^n \int_{|\epsilon_1 - \epsilon_2| \leq 2\epsilon} i(n - i)(1 - \epsilon_1)^{n-i-1}(1 - \epsilon_2)^{i-1} d\epsilon_2 d\epsilon_1 \\ &= \left(\frac{1}{2}\right)^n \int_{|\epsilon_1 - \epsilon_2| \leq 2\epsilon} \sum_{i=1}^{n-1} C_i^n i(n - i)(1 - \epsilon_1)^{n-i-1}(1 - \epsilon_2)^{i-1} d\epsilon_2 d\epsilon_1. \end{aligned} \quad (45)$$

Note that  $C_i^n i(n-i) = n(n-1)C_{i-1}^{n-2}$ , (45) becomes

$$\begin{aligned}
 \mathbf{P} \left[ |\hat{\theta}_S| \leq \epsilon, E \right] &= n(n-1) \left(\frac{1}{2}\right)^n \int_{|\epsilon_1 - \epsilon_2| \leq 2\epsilon} \sum_{i=1}^{n-1} C_{i-1}^{n-2} (1-\epsilon_1)^{n-i-1} (1-\epsilon_2)^{i-1} d\epsilon_2 d\epsilon_1 \\
 &= n(n-1) \left(\frac{1}{2}\right)^n \int_{|\epsilon_1 - \epsilon_2| \leq 2\epsilon} \sum_{i=0}^{n-2} C_i^{n-2} (1-\epsilon_1)^{n-2-i} (1-\epsilon_2)^i d\epsilon_2 d\epsilon_1 \\
 &= n(n-1) \left(\frac{1}{2}\right)^n \int_{|\epsilon_1 - \epsilon_2| \leq 2\epsilon} (2 - \epsilon_1 - \epsilon_2)^{n-2} d\epsilon_2 d\epsilon_1 \\
 &= n(n-1) \left(\frac{1}{2}\right)^n \left[ \int_{[0,1] \times [0,1]} (2 - \epsilon_1 - \epsilon_2)^{n-2} d\epsilon_2 d\epsilon_1 - \int_{|\epsilon_1 - \epsilon_2| > 2\epsilon} (2 - \epsilon_1 - \epsilon_2)^{n-2} d\epsilon_2 d\epsilon_1 \right].
 \end{aligned} \tag{46}$$

Now we compute the two integration in (46)

$$\begin{aligned}
 \int_{[0,1] \times [0,1]} (2 - \epsilon_1 - \epsilon_2)^{n-2} d\epsilon_2 d\epsilon_1 &= \int_0^1 \left[ -\frac{1}{n-1} (2 - \epsilon_1 - \epsilon_2)^{n-1} \Big|_0^1 \right] d\epsilon_1 \\
 &= \int_0^1 \frac{1}{n-1} [(2 - \epsilon_1)^{n-1} - (1 - \epsilon_1)^{n-1}] d\epsilon_1 = \left[ -\frac{1}{n(n-1)} (2 - \epsilon)^n + \frac{1}{n(n-1)} (1 - \epsilon)^n \right] \Big|_0^1 = \frac{2^n - 2}{n(n-1)}.
 \end{aligned} \tag{47}$$

For the second integration, note that it can decomposed as

$$\int_{|\epsilon_1 - \epsilon_2| > 2\epsilon} (2 - \epsilon_1 - \epsilon_2)^{n-2} d\epsilon_2 d\epsilon_1 = \int_0^{1-2\epsilon} \int_{\epsilon_1+2\epsilon}^1 (2 - \epsilon_1 - \epsilon_2)^{n-2} d\epsilon_2 d\epsilon_1 + \int_{2\epsilon}^1 \int_0^{\epsilon_1-2\epsilon} (2 - \epsilon_1 - \epsilon_2)^{n-2} d\epsilon_2 d\epsilon_1. \tag{48}$$

Since the two sub-integration's are identical because the two sub regions are symmetric. We only show the computation for the first.

$$\begin{aligned}
 \int_0^{1-2\epsilon} \int_{\epsilon_1+2\epsilon}^1 (2 - \epsilon_1 - \epsilon_2)^{n-2} d\epsilon_2 d\epsilon_1 &= \int_0^{1-2\epsilon} \left[ -\frac{1}{n-1} (2 - \epsilon_1 - \epsilon_2)^{n-1} \Big|_{\epsilon_1+2\epsilon}^1 \right] d\epsilon_1 \\
 &= \int_0^{1-2\epsilon} \left[ -\frac{1}{n-1} (1 - \epsilon_1)^{n-1} + \frac{2^{n-1}}{n-1} (1 - \epsilon_1 - \epsilon)^{n-1} \right] d\epsilon_1 \\
 &= \left[ \frac{1}{n(n-1)} (1 - \epsilon_1)^n - \frac{2^{n-1}}{n(n-1)} (1 - \epsilon_1 - \epsilon)^n \right] \Big|_0^{1-2\epsilon} \\
 &= \frac{2^{n-1}}{n(n-1)} [\epsilon^n + (1 - \epsilon)^n] - \frac{1}{n(n-1)}.
 \end{aligned} \tag{49}$$

Thus we have

$$\begin{aligned}
 \int_{|\epsilon_1 - \epsilon_2| > 2\epsilon} (2 - \epsilon_1 - \epsilon_2)^{n-2} d\epsilon_2 d\epsilon_1 &= 2 \int_0^{1-2\epsilon} \int_{\epsilon_1+2\epsilon}^1 (2 - \epsilon_1 - \epsilon_2)^{n-2} d\epsilon_2 d\epsilon_1 \\
 &= \frac{2^n}{n(n-1)} [\epsilon^n + (1 - \epsilon)^n] - \frac{2}{n(n-1)}.
 \end{aligned} \tag{50}$$

Combine (47) and (50), we can compute (46) as follows.

$$\begin{aligned}
 \mathbf{P} \left[ |\hat{\theta}_S| \leq \epsilon, E \right] &= n(n-1) \left(\frac{1}{2}\right)^n \left[ \frac{2^n - 2}{n(n-1)} - \frac{2^n}{n(n-1)} (\epsilon^n + (1 - \epsilon)^n) + \frac{2}{n(n-1)} \right] \\
 &= \frac{2^n - 2}{2^n} - \epsilon^n - (1 - \epsilon)^n + \left(\frac{1}{2}\right)^{n-1} \\
 &= 1 - \epsilon^n - (1 - \epsilon)^n
 \end{aligned} \tag{51}$$

Therefore we have

$$\mathbf{P} \left[ |\hat{\theta}_S| \leq \epsilon, E \right] = \begin{cases} 1 - \epsilon^n - (1 - \epsilon)^n & \text{if } \epsilon \leq \frac{1}{2} \\ 1 - \left(\frac{1}{2}\right)^{n-1} & \text{if } \frac{1}{2} < \epsilon \leq 1. \end{cases} \quad (52)$$

Now combine (41) and (52) we have

$$\mathbf{P} \left[ |\hat{\theta}_S| \leq \epsilon \right] = \begin{cases} 1 - \epsilon^n - (1 - \epsilon)^n & \text{if } \epsilon \leq \frac{1}{2} \\ 1 - \left(\frac{1}{2}\right)^{n-1} & \text{if } \frac{1}{2} < \epsilon < 1 \\ 1 & \text{if } \epsilon = 1. \end{cases} \quad (53)$$

which is equivalent to (29).  $\square$

**Lemma 9.** Let  $n = 4m$ , where  $m$  is an integer. Let  $S$  be an  $n$ -item iid sample drawn from  $p_{\mathbb{Z}}$ .  $\forall \epsilon > 0, \forall \delta \in (0, 1)$ ,  $\exists \mathbb{M}(\epsilon, \delta) = \max\{\frac{3e}{\ln 4-1} \ln \frac{3}{\delta}, (\frac{1}{\epsilon} \ln \frac{3}{\delta})^{\frac{1}{2}}\}$  such that  $\forall m \geq \mathbb{M}(\epsilon, \delta)$ ,  $\mathbf{P} \left[ R(\hat{\theta}_{B_{m_s}(S)}) \leq \epsilon \right] > 1 - \delta$ .

*Proof.* Let  $S_1 = \{x \mid (x, 1) \in S\}$  and  $S_2 = \{x \mid (x, -1) \in S\}$  respectively. Then we have  $|S_1| + |S_2| = 4m$ . Define event  $E_1 : \{|S_1| \geq m \wedge |S_2| \geq m\}$ . Then we have

$$\mathbf{P} [E_1] = 1 - 2 \sum_{i=0}^{m-1} C_i^{4m} \left(\frac{1}{2}\right)^{4m}. \quad (54)$$

where we rule out all possible sequences of  $4m$  points which lead to  $|S_1| < m$  or  $|S_2| < m$ . By standard result [37] (Lemma A.5)  $\sum_{k=0}^d C_k^m \leq \left(\frac{em}{d}\right)^d$ , we have

$$\mathbf{P} [E_1] \geq 1 - 2 \left(\frac{4em}{m-1}\right)^{m-1} \left(\frac{1}{2}\right)^{4m} = 1 - \frac{1}{2} \frac{e^{m-1}}{4^m} \left(\frac{m}{m-1}\right)^{m-1} \geq 1 - \frac{1}{2} \left(\frac{e}{4}\right)^m \geq 1 - \left(\frac{e}{4}\right)^m \quad (55)$$

where the 2nd-to-last inequality follows from the fact that  $e \geq (1 + \frac{1}{m-1})^{m-1}$ . Note that by definition  $m \geq \frac{3e}{\ln 4-1} \ln \frac{3}{\delta} > \frac{1}{\ln 4-1} \ln \frac{3}{\delta}$ , thus  $(\frac{e}{4})^m < \frac{\delta}{3}$  and  $\mathbf{P} [E_1] > 1 - \frac{\delta}{3}$ . Since  $|S_1| + |S_2| = 4m$ , then either  $|S_1| \geq 2m$  or  $|S_2| \geq 2m$ . Without loss of generality we assume  $|S_1| \geq 2m$ . We then divide the interval  $[0, 1]$  equally into  $N = \lfloor m^2 (\ln \frac{3}{\delta})^{-1} \rfloor$  segments. The length of each segment is  $\frac{1}{N} = O(\frac{1}{m^2})$  as Figure 4 shows. Note that  $m \geq \frac{3e}{\ln 4-1} \ln \frac{3}{\delta} > 3e \ln \frac{3}{\delta}$ , thus  $N \geq \lfloor 3em \rfloor > 2em > m$ .

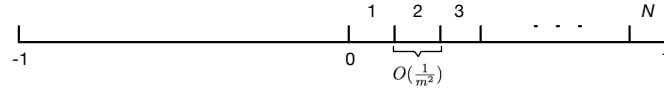

Figure 4: segments

Let  $N_o$  be the number of segments that are occupied by the points in  $S_1$ . Note that  $N_o$  is a random variable. Let  $E_2$  be the event that  $N_o \geq m$ . Now we lower bound  $\mathbf{P} [E_2]$ . This is a variant of the coupon collector's problem: there are  $N$  distinct coupons, and in  $|S_1|$  trials we want to collect at least  $m$  distinct coupons. Note that  $\mathbf{P} [E_2] = 1 - \mathbf{P} [E_2^c] = 1 - \sum_{i=1}^{m-1} \mathbf{P} [N_o = i]$ . Let  $T_i$  be the number of all possible coupon sequences of  $S_1$  such that  $S_1$  occupies exactly  $i$  segments (i.e. distinct coupons). We have  $C_i^n$  ways of choosing  $i$  segments among a total of  $N$ . Also, for each choice of  $i$  segments, the number of all possible coupon sequences of  $S_1$  such that  $S_1$  fully occupies those  $i$  segments without empty is upper bounded by  $i^{|S_1|}$ . Thus  $T_i \leq C_i^n i^{|S_1|}$  and we have

$$\mathbf{P} [N_o = i] = \frac{T_i}{N^{|S_1|}} \leq C_i^n \left(\frac{i}{N}\right)^{|S_1|}. \quad (56)$$

Since  $m \geq \frac{3e}{\ln 4-1} \ln \frac{3}{\delta} > \log_2 \frac{3}{\delta}$ ,  $|S_1| \geq 2m$ , and  $N > 2em$ , thus

$$\begin{aligned} \mathbf{P} [E_2^c] &= \sum_{i=1}^{m-1} \mathbf{P} [N_o = i] \leq \sum_{i=1}^{m-1} C_i^n \left(\frac{i}{N}\right)^{|S_1|} \leq \sum_{i=1}^{m-1} C_i^n \left(\frac{m}{N}\right)^{2m} \\ &< \sum_{i=0}^m C_i^m \left(\frac{m}{N}\right)^{2m} \leq \left(\frac{eN}{m}\right)^m \left(\frac{m}{N}\right)^{2m} = \left(\frac{em}{N}\right)^m < \left(\frac{em}{2em}\right)^m = \left(\frac{1}{2}\right)^m < \frac{\delta}{3}. \end{aligned} \quad (57)$$

Thus  $\mathbf{P}[E_2] \geq 1 - \frac{\delta}{3}$ . Applying union bound,  $\mathbf{P}[E_1, E_2] \geq 1 - \frac{2\delta}{3}$ .

Let  $E_3$  be the following event: there exist a point  $x_2$  in  $S_2$  such that  $-x_2$ , the flipped point, lies in the same segment as some point  $x_1$  in  $S_1$ . If  $E_3$  happens, then  $|x_1 + x_2| = |x_1 - (-x_2)| \leq \frac{1}{N}$ . Note that  $\mathbf{P}[E_3] \geq \mathbf{P}[E_1, E_2, E_3] = \mathbf{P}[E_3 | E_1, E_2] \mathbf{P}[E_1, E_2]$ . Now we lower bound  $\mathbf{P}[E_3 | E_1, E_2]$ . Given  $E_1$  and  $E_2$  happen, we have  $|S_2| \geq m$  and  $N_o \geq m$ . Since  $N = \lfloor m^2(\ln \frac{3}{\delta})^{-1} \rfloor \leq m^2(\ln \frac{3}{\delta})^{-1}$ , we have

$$\mathbf{P}[E_3^c | E_1, E_2] = (1 - \frac{N_o}{N})^{|S_2|} \leq (1 - \frac{m}{N})^{|S_2|} \leq (1 - \frac{m}{N})^m \leq e^{-\frac{m^2}{N}} \leq \frac{\delta}{3}. \quad (58)$$

Thus,  $\mathbf{P}[E_3 | E_1, E_2] = 1 - \mathbf{P}[E_3^c | E_1, E_2] > 1 - \frac{\delta}{3}$ .  $\mathbf{P}[E_3] \geq \mathbf{P}[E_1, E_2, E_3] = \mathbf{P}[E_3 | E_1, E_2] \mathbf{P}[E_1, E_2] \geq (1 - \frac{\delta}{3})(1 - \frac{2\delta}{3}) > 1 - \delta$ . Thus with probability at least  $1 - \delta$ , there exist  $x_2 \in S_2$  and  $x_1 \in S_1$  such that  $|x_1 + x_2| \leq \frac{1}{N}$ .

We now bound  $\frac{1}{N}$ .  $N = \lfloor m^2(\ln \frac{3}{\delta})^{-1} \rfloor \geq \frac{1}{2}m^2(\ln \frac{3}{\delta})^{-1}$ . Therefore  $\frac{1}{N} \leq \frac{2}{m^2} \ln \frac{3}{\delta}$ . Recall by definition  $m \geq (\frac{1}{\epsilon} \ln \frac{3}{\delta})^{\frac{1}{2}}$ , thus  $\frac{1}{N} \leq 2\epsilon$ .

We now have  $|x_1 + x_2| \leq 2\epsilon$ . Finally, since  $\{s_-, s_+\}$  selected by teacher  $B_{m,s}$  is the most symmetric pair, it must satisfy  $|s_- + s_+| \leq |x_1 + x_2| \leq 2\epsilon$ . Putting together, with probability at least  $1 - \delta$ ,  $R(\hat{\theta}_{B_{m,s}(S)}) = \frac{1}{2}|s_- + s_+| \leq \epsilon$ .  $\square$
